# Supplementary material for: Remarkable effect of Pt nanoparticles on visible light-induced oxygen generation from water catalysed by perovskite oxides
Source: Royal Society of Chemistry journal article supplement (doi:10.1039/c4dt02732a), 2014-11-04
Supplement: c4dt02732a1.pdf [file c4dt02732a1.pdf]

**Electronic Supplementary Information**

Figure. S1

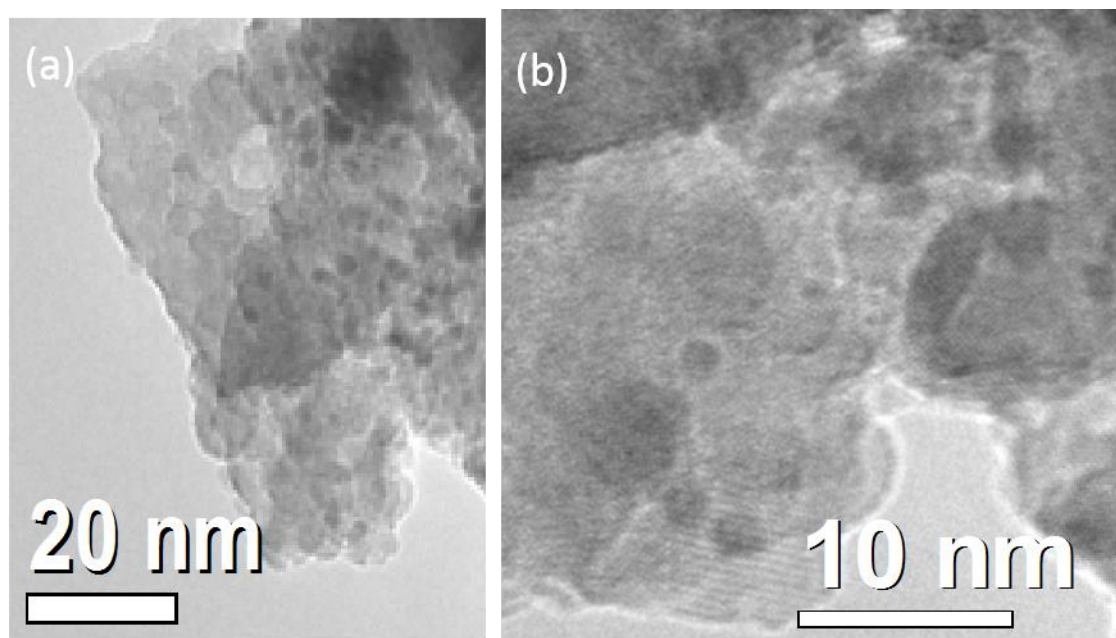

TEM of pattern of LaCoO<sub>3</sub>: Pt (2 wt%)

Figure. S2

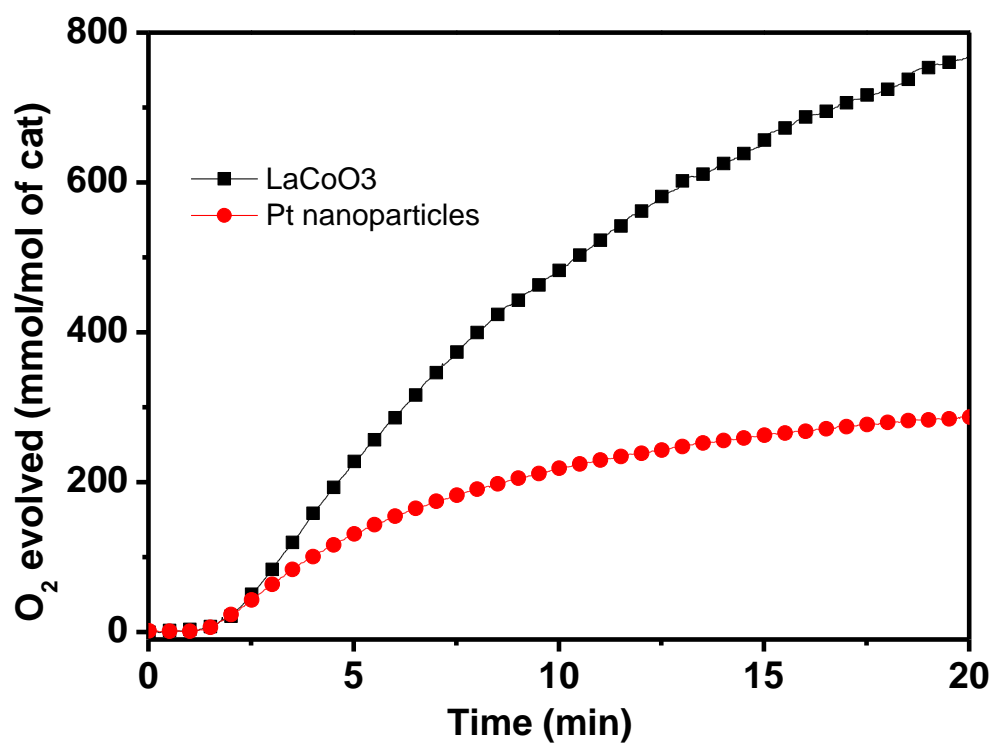

O<sub>2</sub> evolution of the Pt in comparison with LaCoO<sub>3</sub>
